# Supplementary material for: Gut microbiome affects the response to anti-PD-1 immunotherapy in patients with hepatocellular carcinoma
Source: J Immunother Cancer. 2019 Jul 23;7:193. doi: 10.1186/s40425-019-0650-9 (PMC6651993; doi:10.1186/s40425-019-0650-9)
Supplement: Supplementary file 8 — Table S3. Quality control of the sequencing data. (XLSX 19 kb) [file 40425_2019_650_MOESM8_ESM.xlsx]

## Sheet: Table S3
Table S3	Quality control of the sequencing data.
Sample ID	Row reads	Averaged read length (bp)	Averaged Q value	Low quality reads (%)	Adaptors (%)	Host (%)	Single-end reads* (%)	Clean reads	Data used (%)
R1_D0	119681686	82	36	4.51021	0.43483	0.0157284	3.6224	109409212	91.4168
R1_W1	99756352	78	36	6.92945	0.382199	0.0066061	5.70324	86766590	86.9785
R1_W3	90742110	67	35	17.8057	0.0781082	0.00542527	15.6485	60309264	66.4623
R1_W6	134583578	74	36	8.91699	0.122734	0.00981769	8.07887	111531548	82.8716
R1_W9	120696556	71	36	11.5035	0.0777586	0.015872	10.5341	93984854	77.8687
R1_W12	122927040	70	35	12.96	0.0783522	0.00869947	11.8931	92268904	75.0599
R1_W18	91260192	68	35	15.3595	0.0779486	0.00411132	13.4004	64938962	71.158
R1_W21	114682116	70	35	12.7744	0.102049	0.0101175	11.0718	87206162	76.0416
R1_W30	105779876	71	36	12.1966	0.0911109	0.00834563	11.2375	80886052	76.4664
R1_W33	142573516	71	35	12.3375	0.0802056	0.016562	10.715	109568676	76.8507
R1_W36	152519564	71	35	11.347	0.0808421	0.0052072	9.72543	120248702	78.8415
R1_W39	108744248	70	35	15.3123	0.0718981	0.0471519	14.2496	76467946	70.3191
R2_D0	89748514	77	36	7.62868	0.148233	0.00822521	6.30371	77103982	85.9112
R2_W1	87100872	76	36	7.18668	0.132446	0.0106819	5.84574	75624856	86.8245
R2_W12	131729910	71	35	10.7982	0.0866811	0.0530555	9.28498	105090282	79.7771
R2_W15	127946776	69	35	13.6017	0.0963588	0.287213	11.8232	94925638	74.1915
R2_W21	224725440	75	36	7.03815	0.120695	0.426554	5.88541	194453114	86.5292
R2_W3	109824078	70	35	14.5198	0.0701522	0.00961902	13.3771	79098942	72.0233
R2_W6	97632490	69	35	14.1182	0.0739467	0.0498062	12.3762	71644526	73.3818
R2_W9	104812122	68	35	15.2329	0.0765875	0.00857344	13.3276	74788002	71.3543
R3_D0	79409942	78	36	7.9607	0.405851	0.251657	6.72195	67228336	84.6598
R3_W1	87918454	78	36	7.25325	0.274227	0.0193463	6.05136	75963140	86.4018
R3_W3	147466640	74	36	9.3181	0.121484	0.0189623	8.41722	121105850	82.1242
R3_W6	88915346	69	35	16.3393	0.0739647	0.105911	15.1266	60777450	68.3543
R3_W9	114610768	72	36	11.128	0.0683269	0.15955	10.1603	89950942	78.4838
R3_W12	131556082	69	35	13.4708	0.0726291	0.0286805	11.6972	98312750	74.7307
R3_W15	108535262	71	35	13.9063	0.066876	0.988487	12.7464	78462242	72.2919
R3_W18	123073046	71	36	12.8574	0.0672259	0.0736424	11.733	92635510	75.2687
NR1_D0	71249382	75	35	8.71934	0.182357	4.49996	7.09856	56643108	79.4998
NR1_W1	80414976	74	35	9.01228	0.175432	0.0148542	7.46742	67009812	83.33
NR1_W3	88972172	66	35	18.6899	0.082564	0.0114227	16.5251	57556974	64.691
NR1_W6	91367504	69	35	16.0942	0.0817107	0.00939393	14.8913	62973592	68.9234
NR2_D0	92930602	81	36	5.2469	0.330572	0.0199579	4.28672	83745200	90.1158
NR2_W1	104223114	80	36	5.64272	0.320646	0.0399259	4.59519	93177048	89.4015
NR2_W3	125042936	72	36	11.5	0.0909056	0.0582392	10.4555	97402598	77.8953
NR2_W6	126434426	70	35	13.6606	0.0767766	0.153173	12.4583	93120420	73.6512
NR2_W12	99546410	68	35	15.529	0.0651144	0.103085	13.6301	70352140	70.6727
NR3_D0	80901592	78	36	6.64726	0.260957	0.0082211	5.46614	70883896	87.6174
NR3_W1	79170570	76	35	8.29373	0.11482	0.0853044	6.85265	67020656	84.6535
NR3_W3	84286864	68	35	15.91	0.0645237	0.714487	14.0552	58373520	69.2558
NR3_W6	141811040	71	35	11.657	0.0842396	0.0602725	9.92845	110995582	78.2701
NR3_W9	129131038	72	36	10.8216	0.066314	0.013508	9.78569	102417492	79.3128
NR4_D0	73135376	75	35	8.83845	0.139872	0.0308018	7.46868	61084272	83.5222
NR4_W3	109536340	71	35	11.6356	0.0748373	0.0454981	10.0035	85701916	78.2406
NR4_W6	114230048	70	35	12.3978	0.0715906	0.0446835	10.64	87781078	76.8459
NR4_W9	115536616	72	36	11.4189	0.0840374	0.114762	10.3586	90146030	78.0238
NR5_W1	81884858	75	35	8.23295	0.144293	0.00314832	6.88903	69381516	84.7306
NR5_W3	105081430	68	35	15.1562	0.0868041	0.00629321	13.2559	75127706	71.4948
NR5_W6	86461258	69	35	13.3177	0.0544868	0.160355	11.5873	64742276	74.8801
* Referred to the single-end reads not used in the following analyses.
